# Supplementary material
Source: publisher site journal article supplement (https://www.dovepress.com/article/494716)
Supplement: Supplementary file 1 [file get_supplementary_file.php]

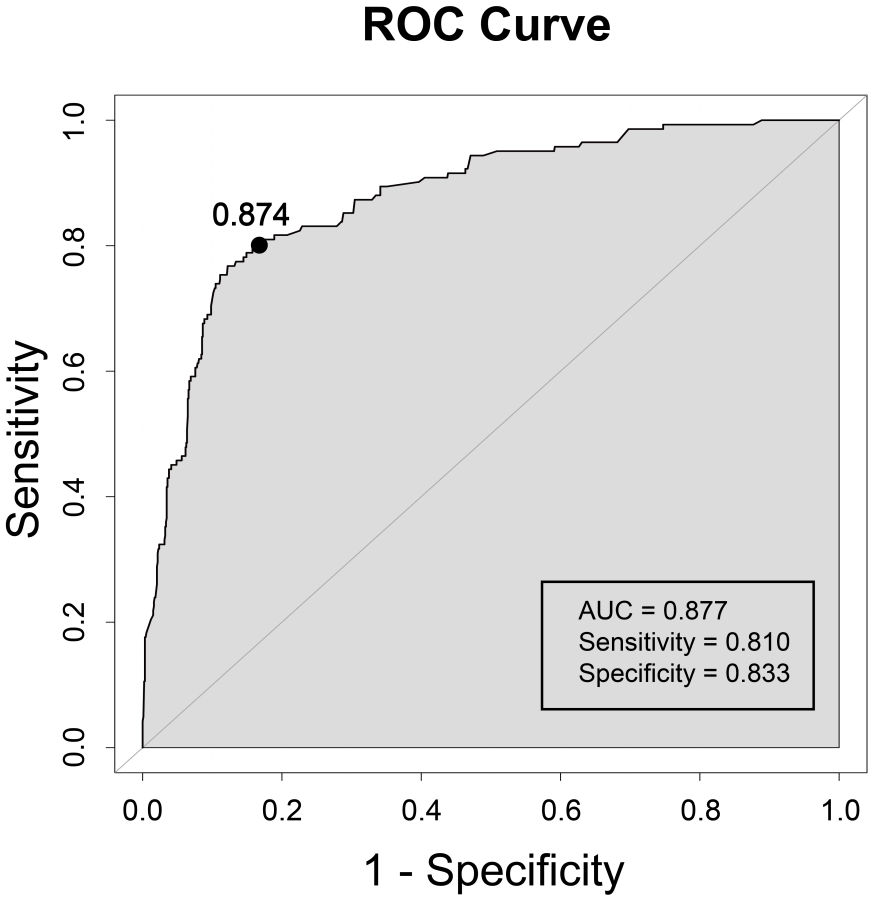


**Supplementary Figure 1**. The ROC curve depicts the 3-year RFS rates predicted by the nomogram for EC. The black dot represents the point with the largest area under the curve (AUC), indicating that the optimal threshold of the predictive model is 0.874. A 3-year RFS rate below 0.874 is classified as the high-risk group, while above 0.874 is classified as the low-risk group (AUC = 0.877).


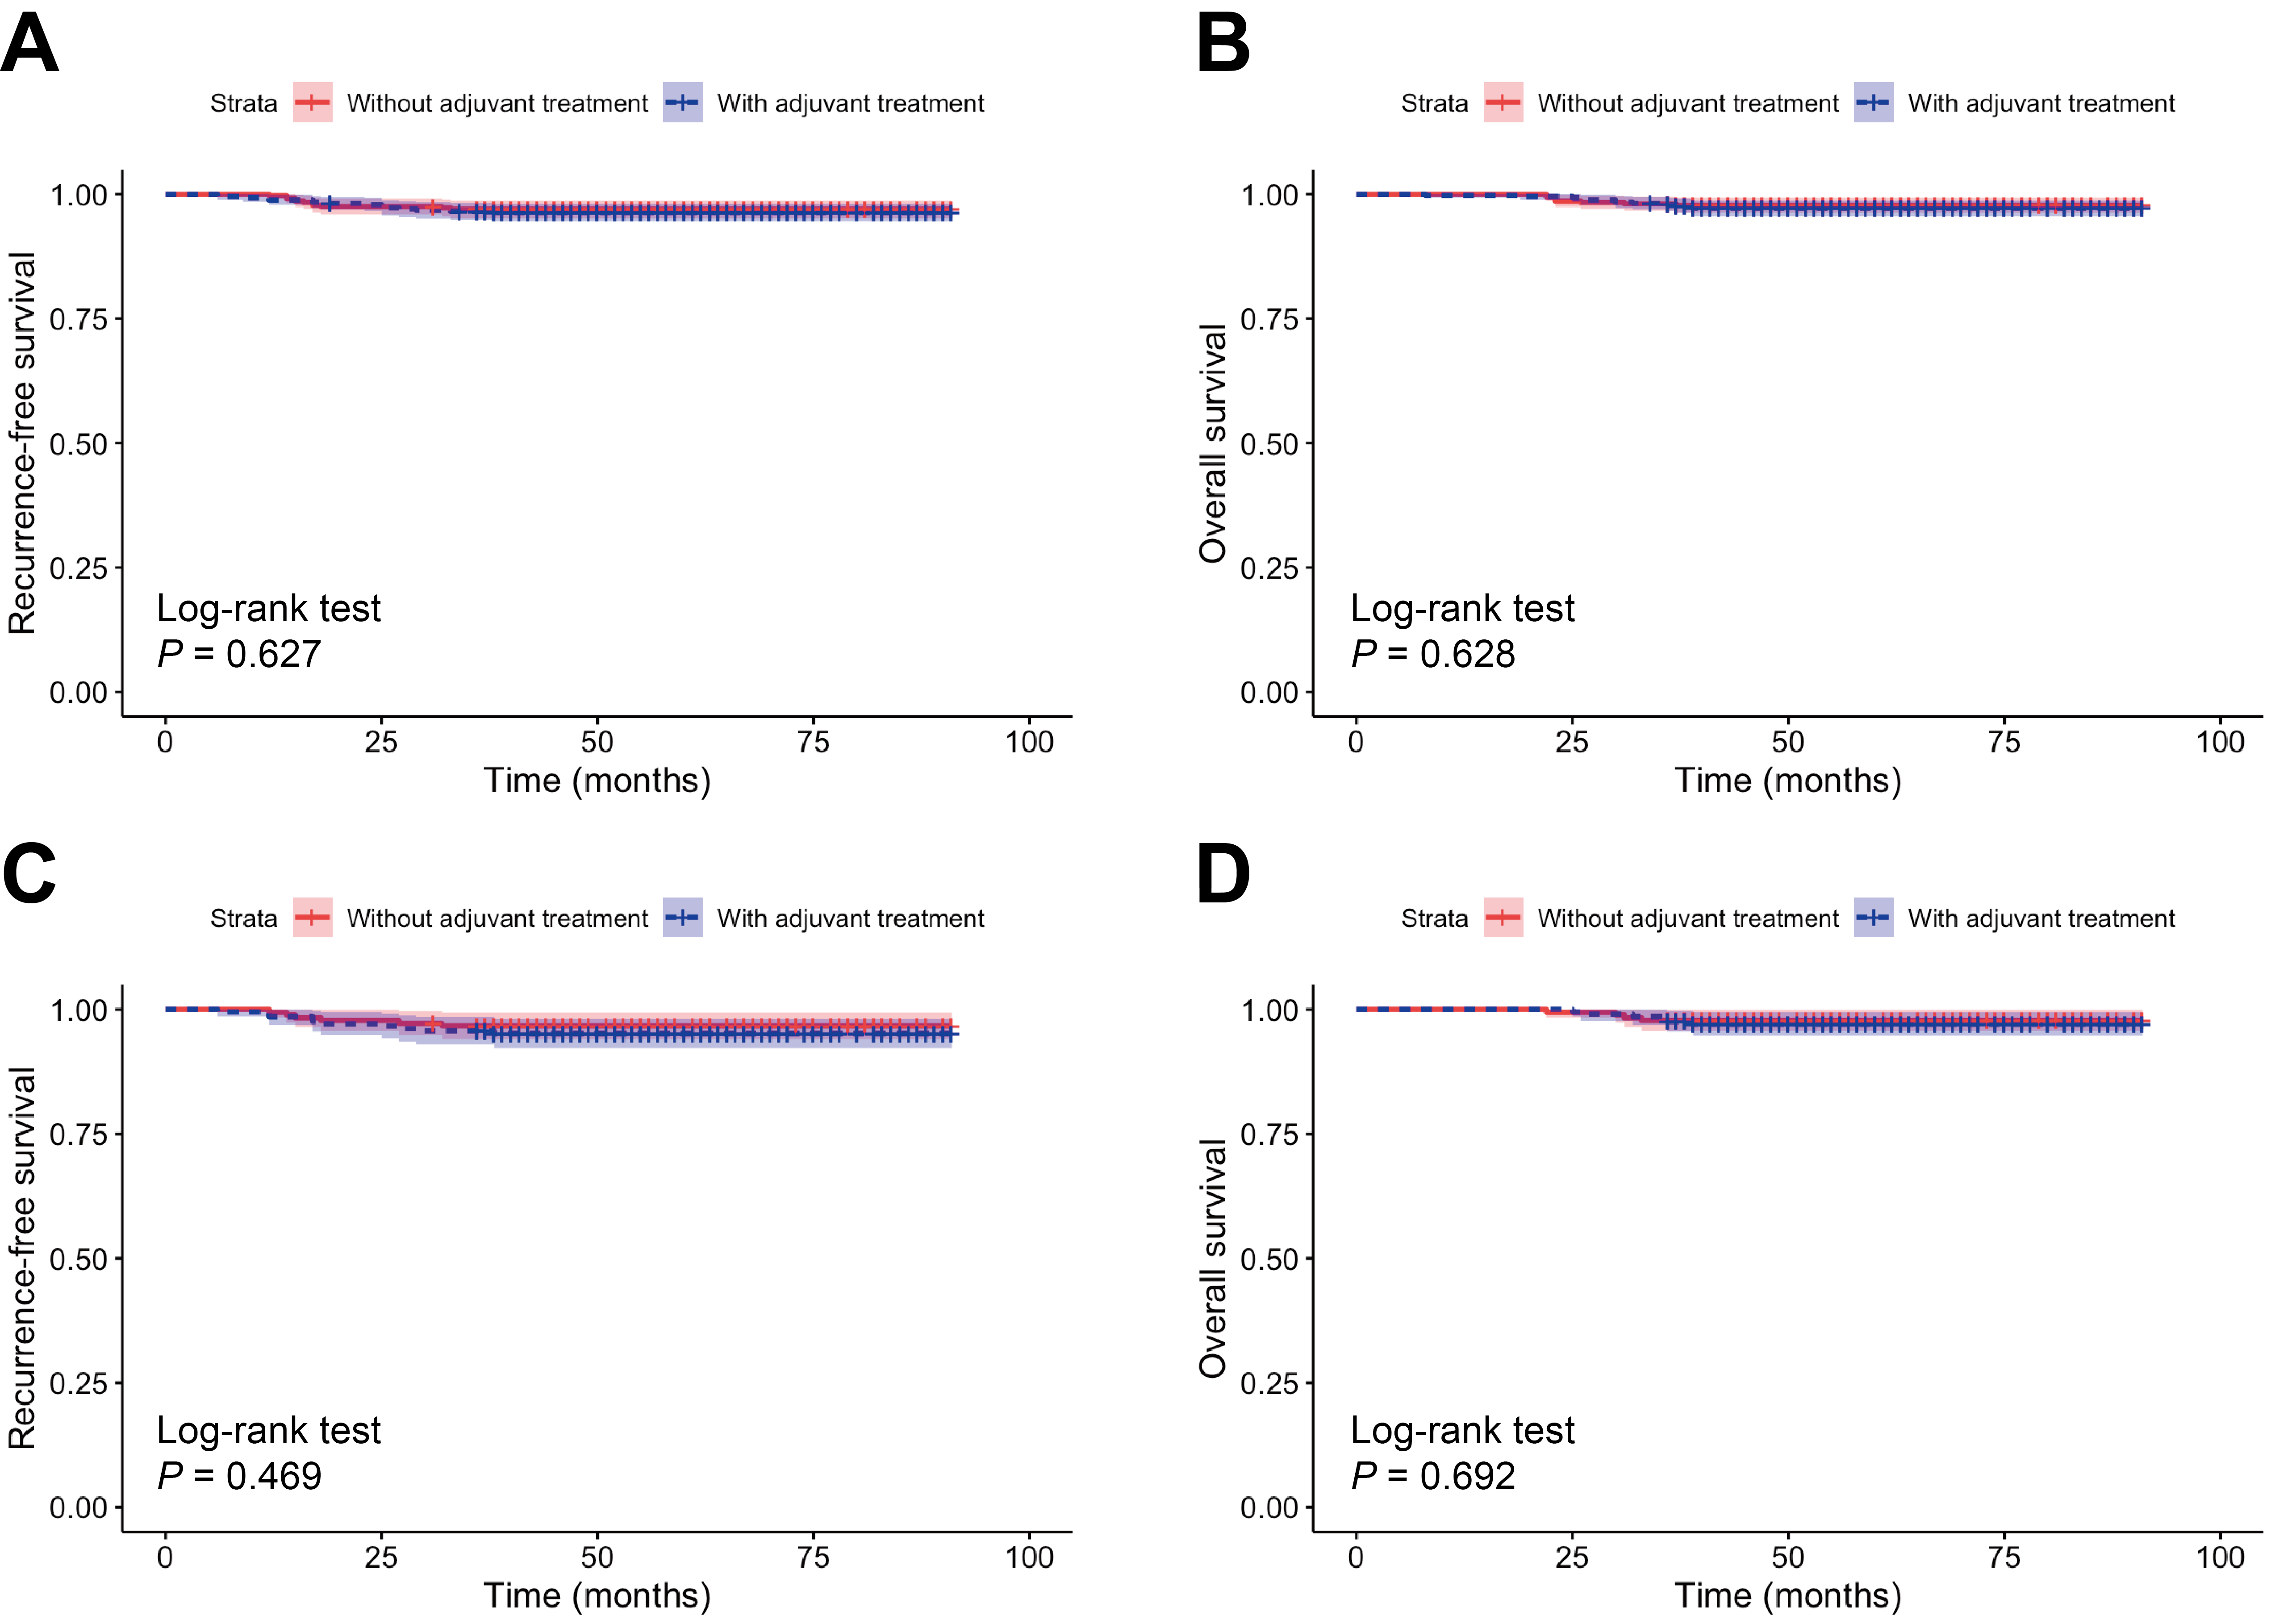


**Supplementary Figure 2.** Survival analysis for RFS and OS of low-risk group patients with or without adjuvant treatment in training cohort (A-B); and the validation cohort (C-D).
